# Supplementary material for: Experimental studies on heat transfer in thermo-magnetic onvection for para- and diamagnetic fluids
Source: Royal Society of Chemistry journal article supplement (doi:10.1039/c1dt10897b), 2014-04-23
Supplement: c1dt10897b.pdf [file c1dt10897b.pdf]

## Electronic Supplementary Information

### **Ferromagnetic heterotrinnuclear Cu-Ni complexes of a compartmental chiral Schiff base**

**Matilde Fondo, Noelia Ocampo, Ana M. García-Deibe, Isabel García-Santos, Jesús  
Sanmartín, J. Antonio Mota, J. Luis Pérez-Lustres**

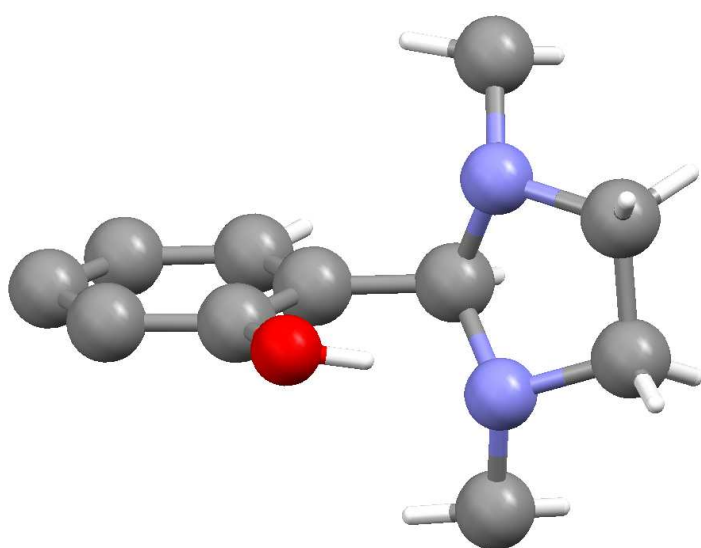

**Fig S1.** Detail of one of the imidazolidine rings and groups in its vicinity, for a better appreciation of its conformation.

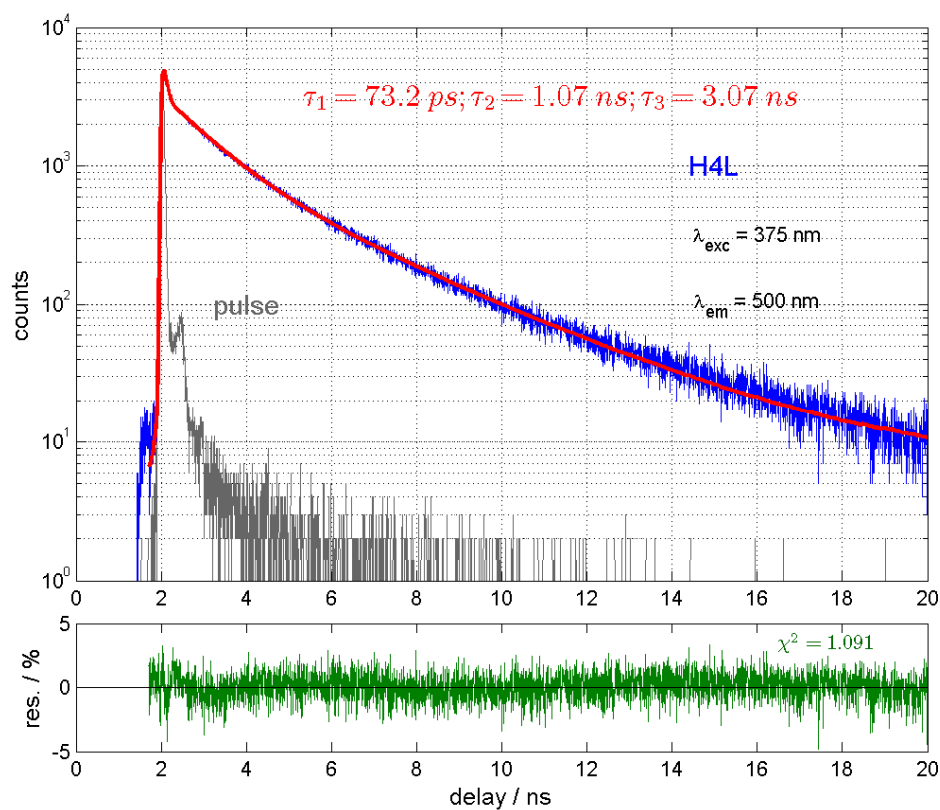

**Fig. S2.** Fluorescence decay curve of H<sub>4</sub>L (blue) measured at 500 nm and magic angle polarization with 375 nm excitation (pulse profile shown in grey). The decay curve was deconvoluted and fitted to a triexponential function (red). The weighted residuals are shown in the lower panel (green).

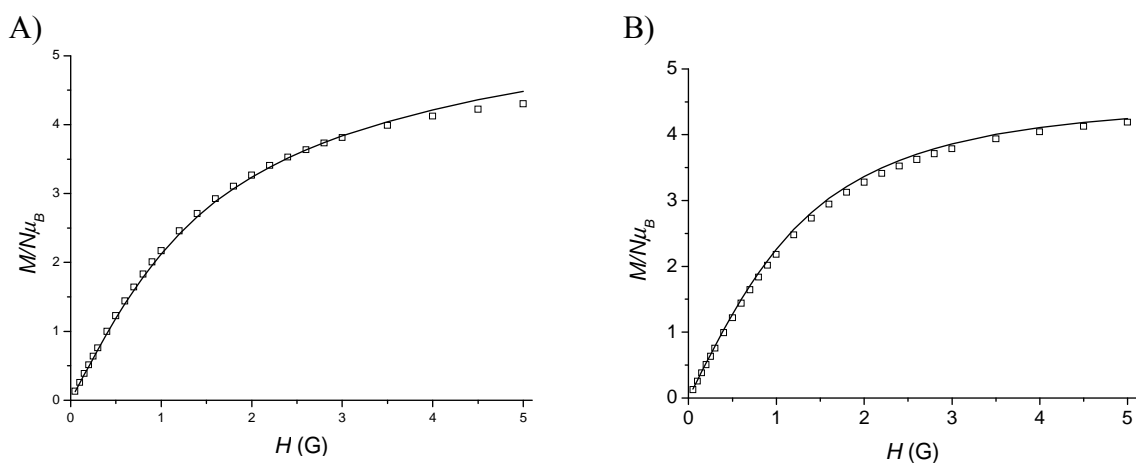

**Fig. S3.** A) Plot of  $M/\mu_B$  vs  $H$  at 2 K for 1·0.25H<sub>2</sub>O·2.5MeOH: □: experimental results; solid line: best fit. B) Plot of  $M/\mu_B$  vs  $H$  at 2 K for 2·3.25H<sub>2</sub>O·0.5MeOH: □: experimental results; solid line: best fit.
